# Supplementary material for: Doubling dolutegravir dosage reduces the viral reservoir in ART-treated people with HIV
Source: eLife. 2026 Jan 23;14:RP106931. doi: 10.7554/eLife.106931 (PMC12829993; doi:10.7554/eLife.106931)
Supplement: Figure 2—figure supplement 1—source data 1. [file elife-106931-fig2-figsupp1-data1.xlsx]

## Sheet: Sheet1
Plasma DTG
time, days	Intensified group
0	2066	6593	5027	6301	3136	2029	2780	237	3395	6453
1	9347	3395	9196	2305	6531	5244	6195	8666	2391	7605
56	5924	9314	9711	9281	8516	6826	8923	6817	6667	11500
84	9845	4437	10320	9592	6309	3418	7349	2958	2383	12430
time, days	Control group
0	2008	3179	3979	5536	2899	4613	3941	1969	5306	3113
1	3082	5213	5506	7041	4038	3069	5183	1904	4802	3658
56	2719	4460	6112	6796	3820	6485	6146	3871	4627	3302
84	2793	3086	4592	3510	3396	5017	4573	3379	3984	2141
Plasma 3TC
time, days	Intensified group
0	77.47	1156	334.6	838.8	152	105	297.2	50	195.7	474.2
1	2025	57.47	943.8	51.17	237.7	220.3	891.1	1058	132.9	861.5
56	104.6	1130	763.3	1684	171.6	600.9	2254	350.5	612.9	1833
84	2286	64.27	437.2	1295	162.6	120	634.7	135	65.75	455.1
time, days	Control group
0	101.9	1023	232.6	1034	476.1	1616	385.5	135.7	695.2	207.2
1	547	1991	586.5	3174	899.8	1370	1622	148	391.4	916.4
56	202.6	1639	1021	1976	844.8	4713	1604	894.3	869.8	270.1
84	252.1	928.1	221.4	889.5	279	1917	501.8	329.6	239.1	199.3
