# Supplementary material for: Doubling dolutegravir dosage reduces the viral reservoir in ART-treated people with HIV
Source: eLife. 2026 Jan 23;14:RP106931. doi: 10.7554/eLife.106931 (PMC12829993; doi:10.7554/eLife.106931)
Supplement: Figure 2—source data 1. [file elife-106931-fig2-data1.xlsx]

## Sheet: Fig 2A
Intensified group			Control group
D0	D84		D0	D84
2066	9845		2008	2793
6593	4437		3179	3086
5027	10320		3979	4592
6301	9592		5536	3510
3136	6309		2899	3396
2029	3418		4613	5017
2780	7349		3941	4573
237	2958		1969	3379
3395	2383		5306	3984
6453	12430		3113	2141
