# Supplementary material for: Doubling dolutegravir dosage reduces the viral reservoir in ART-treated people with HIV
Source: eLife. 2026 Jan 23;14:RP106931. doi: 10.7554/eLife.106931 (PMC12829993; doi:10.7554/eLife.106931)
Supplement: Figure 2—source data 2. [file elife-106931-fig2-data2.xlsx]

## Sheet: Fig 2B
Intensified group			Control group
D0	D84		D0	D84
408.7	1887		532.1	383.7
633.6	801.3		495.2	450.2
890.1	2210		1067	555.4
1036	2013		787.2	1202
538.7	1414		539.2	514.5
534.7	484.8		873.7	2172
714.2	6823		697.9	1745
302.8	961.9		1810	643
581.4	572.2		775.1	809.2
	1914		481.9	2883
