# Supplementary material for: Doubling dolutegravir dosage reduces the viral reservoir in ART-treated people with HIV
Source: eLife. 2026 Jan 23;14:RP106931. doi: 10.7554/eLife.106931 (PMC12829993; doi:10.7554/eLife.106931)
Supplement: Figure 2—source data 3. [file elife-106931-fig2-data3.xlsx]

## Sheet: Fig 2C
Intensified group			Control group
D0	D84		D0	D84
77.47	2286		101.9	252.1
1156	64.27		1023	928.1
334.6	437.2		232.6	221.4
838.8	1295		1034	889.5
152	162.6		476.1	279
105	120		1616	1917
297.2	634.7		385.5	501.8
50	135		135.7	329.6
195.7	65.75		695.2	239.1
474.2	455.1		207.2	199.3
