# Supplementary material for: Doubling dolutegravir dosage reduces the viral reservoir in ART-treated people with HIV
Source: eLife. 2026 Jan 23;14:RP106931. doi: 10.7554/eLife.106931 (PMC12829993; doi:10.7554/eLife.106931)
Supplement: Figure 2—source data 4. [file elife-106931-fig2-data4.xlsx]

## Sheet: Fig 2D
Intensified group			Control group
D0	D84		D0	D84
900	3337		1215	1969
3187	1410		2922	5263
2322	2506		1341	1615
2159	3612		2368	4051
1931	1758		3130	1648
1233	2166		1882	1860
2317	3282		2278	1992
934	1948		2109	1662
2114	1658		1492	2106
	1697		4495	2115
