# Supplementary material for: Doubling dolutegravir dosage reduces the viral reservoir in ART-treated people with HIV
Source: eLife. 2026 Jan 23;14:RP106931. doi: 10.7554/eLife.106931 (PMC12829993; doi:10.7554/eLife.106931)
Supplement: Figure 3—figure supplement 1—source data 1. [file elife-106931-fig3-figsupp1-data1.xlsx]

## Sheet: Sheet1
time, days	Intensified group
0	61.8	798	579	153	512	753	199	99.1	330	1090
1	7.18	1250	644	61.3	350	761		37.3	186	1390
28	11.8	1030	314	53.8	29.1	889	8.13	81.5	140	981
56	93.7	1370	789	11.6		1060	42.5	148	155	982
84	7.83	817	753	166	222	630	77	117	314	863
time, days	Control group
0	128	104	35.8	333	94.7	15.1	37.9	57.7	332	198
1	80.1	116	43.6	490	144	14.3	330	73.5	523	472
28	40.4	69.3	27.4	625	290	11.8	151	96.6	62.2	148
56	148	152	23.6	518	160	21	212	94.7	155	170
84	201	166	35.3	378	120	43	338		241	459
