# Supplementary material for: Doubling dolutegravir dosage reduces the viral reservoir in ART-treated people with HIV
Source: eLife. 2026 Jan 23;14:RP106931. doi: 10.7554/eLife.106931 (PMC12829993; doi:10.7554/eLife.106931)
Supplement: Figure 3—figure supplement 1—source data 3. [file elife-106931-fig3-figsupp1-data3.xlsx]

## Sheet: Fig 3 fs 1C
Intensification	Control
-0.481	-0.147
0.151	0.036
-0.01	-0.081
-0.589	0.193
-0.766	0.277
0.06
-0.755	0.761
-0.033	0.196
-0.276	-0.339
-0.033	0.056
