# Supplementary material for: Doubling dolutegravir dosage reduces the viral reservoir in ART-treated people with HIV
Source: eLife. 2026 Jan 23;14:RP106931. doi: 10.7554/eLife.106931 (PMC12829993; doi:10.7554/eLife.106931)
Supplement: Figure 3—figure supplement 1—source data 4. [file elife-106931-fig3-figsupp1-data4.xlsx]

## Sheet: Fig 3 fs 1D
Day 1			Day 28			Day 56			Day 84
Intensification	Control		Intensification	Control		Intensification	Control		Intensification	Control
0.116031	0.626319		0.190156	0.315759		1.51537	1.15872		0.13	1.57
1.56889	1.12094		1.29071	0.667759		1.7226	1.46731		1.02	1.6
1.113	1.22015		0.542699	0.76582		1.36323	0.660207		1.3	0.99
0.400564	1.47187		0.351174	1.87567		0.0756338	1.55562		1.08	1.14
0.683222	1.51762		0.0568537	3.05912		1.40864	1.68615		0.43	1.27
1.01016	8.70143		1.18078	3.97638		0.213334	1.39182		0.84	2.85
0.376794	1.27342		0.040784	1.67424		1.49542	5.5981		0.39	8.92
0.564453	1.57651		0.822803	0.187665		0.46871	1.64018		1.18
1.27776	2.38465		0.424866	0.746009		0.904218	0.465984		0.95	0.73
			0.903482				0.859438		0.79	2.32
