# Supplementary material for: Doubling dolutegravir dosage reduces the viral reservoir in ART-treated people with HIV
Source: eLife. 2026 Jan 23;14:RP106931. doi: 10.7554/eLife.106931 (PMC12829993; doi:10.7554/eLife.106931)
Supplement: Figure 3—figure supplement 1—source data 5. [file elife-106931-fig3-figsupp1-data5.xlsx]

## Sheet: Sheet1
Intensified group
time, days	P4	P5	P6	P7	P8	P9	P10	P11	P13	P14
1	0.12	1.57	1.11	0.4	0.68	1.01		0.38	0.56	1.28
28	0.19	1.29	0.54	0.35	0.06	1.18	0.04	0.82	0.42	0.9
56	1.52	1.72	1.36	0.08		1.41	0.21	1.5	0.47	0.9
84	0.13	1.02	1.3	1.08	0.43	0.84	0.39	1.18	0.95	0.79
Control group
time, days	P1	P2	P3	P12	P15	P16	P17	P18	P19	P20
1	0.63	1.12	1.22	1.47	1.52		8.7	1.27	1.58	2.38
28	0.32	0.67	0.77	1.88	3.06		3.98	1.67	0.19	0.75
56	1.16	1.47	0.66	1.56	1.69	1.39	5.6	1.64	0.47	0.86
84	1.57	1.6	0.99	1.14	1.27	2.85	8.93		0.73	2.32
