# Supplementary material for: Doubling dolutegravir dosage reduces the viral reservoir in ART-treated people with HIV
Source: eLife. 2026 Jan 23;14:RP106931. doi: 10.7554/eLife.106931 (PMC12829993; doi:10.7554/eLife.106931)
Supplement: Figure 3—figure supplement 2—source data 1. [file elife-106931-fig3-figsupp2-data1.xlsx]

## Sheet: Sheet1
time, days	Intensified group
0	2.53	170	1580	3.92	276	876	79.2	26.8	21.3	496
1	3.57	252	336	2.94	5.26	614		64.5	141	1040
28	142	2.01	371	24.4	77.1	202	7.63	32.4	2.56	270
56	13.5	104	410	9.41		10.8	13.4	22.5	7.45	655
84	12.7	28.7	559	1.98	23.3	138	23.3	32.6	4.94	75
time, days	Control group
0	39.4	295	142	13.8	6.18	13.1	105	9.48	486	240
1	1.36	364	102	437	142	16.5	860	13.8	19.9	12.1
28	24.9	461	207	17.3	17.6	12.8		4.41	543	11.9
56	51.8	334	520	3.31	322	7.92	586	8.87	55	50
84	701	125	15.4	95.7	303	118	242		15	178
