# Supplementary material for: Doubling dolutegravir dosage reduces the viral reservoir in ART-treated people with HIV
Source: eLife. 2026 Jan 23;14:RP106931. doi: 10.7554/eLife.106931 (PMC12829993; doi:10.7554/eLife.106931)
Supplement: Figure 3—figure supplement 2—source data 3. [file elife-106931-fig3-figsupp2-data3.xlsx]

## Sheet: Fig 3 fs 1C
Intensification	Control
	-0.065
-0.805	0.032
-0.59	0.073
-0.915	1.232
-1.005
-0.685	0.734
0.076
-0.425	-0.787
-0.133	-0.891
