# Supplementary material for: Doubling dolutegravir dosage reduces the viral reservoir in ART-treated people with HIV
Source: eLife. 2026 Jan 23;14:RP106931. doi: 10.7554/eLife.106931 (PMC12829993; doi:10.7554/eLife.106931)
Supplement: Figure 3—figure supplement 2—source data 5. [file elife-106931-fig3-figsupp2-data5.xlsx]

## Sheet: Sheet1
Intensified group
time, days	P4	P5	P6	P7	P8	P9	P10	P11	P13	P14
1		1.48	0.21		0.02	0.7		2.41	6.62	2.1
28	56.28	0.01	0.24	6.21	0.28	0.23	0.1	1.21	0.12	0.54
56		0.61	0.26			0.01	0.17	0.84	0.35	1.32
84		0.17	0.35		0.08	0.16	0.29	1.22	0.23	0.15
Control group
time, days	P1	P2	P3	P12	P15	P16	P17	P18	P19	P20
1	0.03	1.24	0.72	31.66	22.96		8.19		0.04	0.05
28	0.63	1.57	1.46		2.85				1.12	0.05
56	1.32	1.13	3.67		52.03		5.58	0.94	0.11	0.21
84	17.81	0.42	0.11		48.96	9.02	2.3		0.03	0.74
