# Supplementary material for: Doubling dolutegravir dosage reduces the viral reservoir in ART-treated people with HIV
Source: eLife. 2026 Jan 23;14:RP106931. doi: 10.7554/eLife.106931 (PMC12829993; doi:10.7554/eLife.106931)
Supplement: Figure 3—figure supplement 3—source data 1. [file elife-106931-fig3-figsupp3-data1.xlsx]

## Sheet: Sheet1
time, days	Intensified group
0	0.0409	0.213	2.73	0.0256	0.539	1.16	0.397	0.27	0.0646	0.456
1		0.201	0.522	0.0479	0.015	0.807		1.73	0.758	0.749
28	12.1	0.00195	1.18	0.453	2.65	0.227		0.397	0.0183	0.275
56	0.144	0.0758	0.519			0.0101	0.315	0.152	0.0481	0.667
84		0.0351	0.742	0.0119	0.105	0.219	0.302	0.279	0.0157	0.0869
time, days	Control group
0	0.308	2.84	3.96	0.0414	0.0653		2.77	0.164	1.47	1.21
1	0.017	3.13	2.34	0.891	0.987		2.61	0.188	0.0381	0.0257
28	0.617	6.66	7.54	0.0277	0.0609			0.0456	8.72	0.0806
56	0.35	2.19	22	0.00638	2.01	0.378	2.76	0.0937	0.356	0.294
84	3.5	0.752	0.435	0.253	2.52	2.74	0.715		0.0623	0.387
