# Supplementary material for: Doubling dolutegravir dosage reduces the viral reservoir in ART-treated people with HIV
Source: eLife. 2026 Jan 23;14:RP106931. doi: 10.7554/eLife.106931 (PMC12829993; doi:10.7554/eLife.106931)
Supplement: Figure 3—figure supplement 3—source data 2. [file elife-106931-fig3-figsupp3-data2.xlsx]

## Sheet: Sheet1
Intensified group			Control group
D0	D84		D0	D84
-1.39			-0.51	0.54
-0.67	-1.45		0.45	-0.12
0.44	-0.13		0.6	-0.36
-1.59	-1.92		-1.38	-0.6
-0.27	-0.98		-1.19	0.4
0.07	-0.66			0.44
-0.4	-0.52		0.44	-0.15
-0.57	-0.55		-0.78
-1.19	-1.8		0.17	-1.21
-0.34	-1.06		0.08	-0.41
