# Supplementary material for: Doubling dolutegravir dosage reduces the viral reservoir in ART-treated people with HIV
Source: eLife. 2026 Jan 23;14:RP106931. doi: 10.7554/eLife.106931 (PMC12829993; doi:10.7554/eLife.106931)
Supplement: Figure 3—figure supplement 3—source data 3. [file elife-106931-fig3-figsupp3-data3.xlsx]

## Sheet: Sheet1
Intensification	Control
	0.08
-0.953	-0.002
-0.576	0.14
-0.154	0.949
-1.068
-0.07	-0.098
0.11
-0.147	-0.45
-0.104	-0.946
