# Supplementary material for: Doubling dolutegravir dosage reduces the viral reservoir in ART-treated people with HIV
Source: eLife. 2026 Jan 23;14:RP106931. doi: 10.7554/eLife.106931 (PMC12829993; doi:10.7554/eLife.106931)
Supplement: Figure 3—figure supplement 3—source data 4. [file elife-106931-fig3-figsupp3-data4.xlsx]

## Sheet: Sheet1
Day 1			Day 28			Day 56			Day 84
Intensification	Control		Intensification	Control		Intensification	Control		Intensification	Control
	0.0551476		295.957	2.00526			1.13576			11.3546
0.945063	1.10291		0.00915945	2.34466		0.355482	0.772073		0.164899	0.26479
0.191526	0.590081		0.433685	1.90461		0.190357	5.56179		0.272191	0.109964
	21.5089		17.6824							6.10157
0.027872	15.1259		4.91217	0.932487			30.8549		0.194837	38.6117
0.693749			0.194915			0.00871201			0.188275
	0.940928					0.792166	0.996283		0.759828	0.257783
6.39309			1.46955			0.5627			1.03104
11.7353	0.0259785		0.282993	5.95319		0.7452	0.242907		0.24376	0.0424943
1.63997	0.0211547		0.602724	0.0664146		1.46026	0.242126		0.190338	0.318535
