# Supplementary material for: Doubling dolutegravir dosage reduces the viral reservoir in ART-treated people with HIV
Source: eLife. 2026 Jan 23;14:RP106931. doi: 10.7554/eLife.106931 (PMC12829993; doi:10.7554/eLife.106931)
Supplement: Figure 3—figure supplement 3—source data 5. [file elife-106931-fig3-figsupp3-data5.xlsx]

## Sheet: Sheet1
Intensified group
time, days	P4	P5	P6	P7	P8	P9	P10	P11	P13	P14
1		0.945	0.192		0.0279	0.694		6.39	11.7	1.64
28		0.00916	0.434	17.7	4.91	0.195		1.47	0.283	0.603
56		0.355	0.19			0.00871	0.792	0.563	0.745	1.46
84		0.165	0.272		0.195	0.188	0.76	1.03	0.244	0.19
Control group
time, days	P1	P2	P3	P12	P15	P16	P17	P18	P19	P20
1	0.0551	1.1	0.59	21.5	15.1		0.941		0.026	0.0212
28	2.01	2.34	1.9		0.932				5.95	0.0664
56	1.14	0.772	5.56		30.9		0.996	0.57	0.243	0.242
84	11.4	0.265	0.11	6.1	38.6		0.258		0.0425	0.319
