# Supplementary material for: Doubling dolutegravir dosage reduces the viral reservoir in ART-treated people with HIV
Source: eLife. 2026 Jan 23;14:RP106931. doi: 10.7554/eLife.106931 (PMC12829993; doi:10.7554/eLife.106931)
Supplement: Figure 3—source data 3. [file elife-106931-fig3-data3.xlsx]

## Sheet: Sheet1
time, days	Intensified group
1		0.945	0.192		0.0279	0.694		6.39	11.7	1.64
28		0.00916	0.434	17.7	4.91	0.195		1.47	0.283	0.603
56		0.355	0.19			0.00871	0.792	0.563	0.745	1.46
84		0.165	0.272		0.195	0.188	0.76	1.03	0.244	0.19
time, days	Control group
1	0.0551	1.1	0.59	21.5	15.1		0.941		0.026	0.0212
28	2.01	2.34	1.9		0.932				5.95	0.0664
56	1.14	0.772	5.56		30.9		0.996	0.57	0.243	0.242
84	11.4	0.265	0.11	6.1	38.6		0.258		0.0425	0.319
