# Supplementary material for: Doubling dolutegravir dosage reduces the viral reservoir in ART-treated people with HIV
Source: eLife. 2026 Jan 23;14:RP106931. doi: 10.7554/eLife.106931 (PMC12829993; doi:10.7554/eLife.106931)
Supplement: Figure 3—source data 5. [file elife-106931-fig3-data5.xlsx]

## Sheet: Fig 3E
Intensified group			Control group
D0	D84		D0	D84
0.861697	1.06634		2.34649	2.66349
2.53243	2.00907		2.78828	2.86179
2.99177	3.12141		2.76803	2.39139
0.872355	2.48675		3.06815	2.74472
2.68963	2.65922		2.56025	2.85066
3.17898	3.28225		1.7276	1.85537
2.50901	2.32408		3.23669	3.24273
2.41003	2.3575		2.49741	2.4096
2.6677	2.47921		2.70621	2.67623
2.97439	3.03603		3.12934	3.12048
