# Supplementary material for: Doubling dolutegravir dosage reduces the viral reservoir in ART-treated people with HIV
Source: eLife. 2026 Jan 23;14:RP106931. doi: 10.7554/eLife.106931 (PMC12829993; doi:10.7554/eLife.106931)
Supplement: Figure 4—figure supplement 1—source data 1. [file elife-106931-fig4-figsupp1-data1.xlsx]

## Sheet: Sheet1
CD4+PD-1+
time, days	Intensified group
0	39.2	24.1	9.19	12.2	21.5	31.8	21.2	27	10.2	35.9
28		21.7	12	10.7	18.8	29.6	22.1	27.3
56									11.6
84	40.2	19.6	32.5	8.65	15.6	29.7	19.5	25	12.2	39.1
time, days	Control group
0	22.2	10.3	23.7	22.5	23.7	21.6	22.7	13.2	24.8	23.9
28			31.3		19.4		20.1	12.4		23.2
56	29.9	13.6		29		27.7		15.3	36.9	21.3
84	32.2	11	19.7	33.9	21.7	23.4	25
CD4+TIGIT+
time, days	Intensified group
0	33.9	17.8	27.4	11.8	15	25.9	23.2	24.8	20.1	23.4
28		17.5	25.7	9.92	16.9	23.9	23.3	23
56									18.5
84	35.4	16.9	29.2	10.4	16.5	23.9	22.6	22	19.6	21.4
time, days	Control group
0	28.2	14.1	20.3	22	18.2	18.9	20.5	19.7	19.8	16.2
28			20.2		18.2		21	18.1		12.7
56	26.5	15.4		20.5		19.1		19.7	31.5	13.8
84	31.8	17.4	21.2	23.3	16.5	21.5	24.2
CD4+HLA-DR+
time, days	Intensified group
0	18.2	9.15	18.6	3.6	6.52	8.94	6.95	7.55	8.38	7.34
28		8.01	20.1	3.64	9.09	9.75	6.57	6.91
56									7.01
84	19.5	6.18	23.7	3.26	5.8	10	4.71	8.89	8.22	6.45
time, days	Control group
0	3.69	5.98	15.9	8.15	7.53	6.32	3.31	2.89	3.9	16.3
28			22.2		7.87		4	2.21		14.2
56	4.25	6.98		9.11		6.61		3.65	7.06	12.2
84	5.96	6.31	14.1	10.4	7.13	5.9	4.83
CD4+CD38+
time, days	Intensified group
0	2.22	0.73	3.42	1.69	1.16	1.89	1.45	1.27	1.12	1.49
28		0.73	1.21	1.31	1.39	2.44	1.56	1.37
56									1.6
84	2.83	0.51	3.17	2.2	1.31	2.38	1.14	1.38	1.48	1.15
time, days	Control group
0	2.5	1.62	3.15	0.84	1.92	2.91	4.47	1.26	5.39	3.43
28			3.07		2.14		2.82	2.14		1.8
56	4.09	1.63		1.7		3.11		1.93	3.28	2.09
84	3.5	1.24	0.7	1.56	2.44	3.45	3.12
CD4+CD38+HLA-DR+
time, days	Intensified group
0	0.89	0.12	0.65	0.093	0.34	0.45	0.15	0.34	0.12	0.24
28		0.13	0.51	0.061	0.19	0.68	0.19	0.18
56									0.22
84	0.6	0.078	1.09	0.035	0.12	0.46	0.15	0.19	0.22	0.34
time, days	Control group
0	0.2	0.17	0.8	0.16	0.33	0.47	0.5	0.19	0.57	1.26
28			0.64		0.26		0.46	0.34		0.59
56	0.44	0.37		0.67		0.83		0.33	0.68	0.29
84	0.46	0.21	0.21	0.47	0.23	0.35	0.36
