# Supplementary material for: Doubling dolutegravir dosage reduces the viral reservoir in ART-treated people with HIV
Source: eLife. 2026 Jan 23;14:RP106931. doi: 10.7554/eLife.106931 (PMC12829993; doi:10.7554/eLife.106931)
Supplement: Figure 4—figure supplement 1—source data 2. [file elife-106931-fig4-figsupp1-data2.xlsx]

## Sheet: Sheet1
CD8+PD-1+
time, days	Intensified group
0	45.6	14	11.9	10.1	30.5	26.2	34.1	17.1	12.3	22.4
28		14.7	13.9	9.69	34.7	24.8	29.1	18.4
56									14.5
84	43.4	14.2	15.7	10.9	29.5	24.6	34.5	18	15.1	22.4
time, days	Control group
0	32.6	16.5	34.5	24.5	37.5	25	47.4	7.67	48	25.8
28			35.5		46.7		44.8	6.93		23.5
56	36.7	12.7		25.5		26.7		6.58	31.6	22.7
84	39.5	15.5	24.8	30.1	41.2	24.3	46.6
CD8+TIGIT+
time, days	Intensified group
0	59.1	46.5	34.1	28.6	54.9	48.1	57.5	37	43.2	38.4
28		42.2	34.7	28	55.9	49.4	59	38.3
56									38
84	58.2	40.9	39.6	29.4	49.4	48.3	56.2	33.2	40.8	38.1
time, days	Control group
0	50.9	39.9	63.1	69.8	42.4	37.2	46.7	31.3	41.8	49.1
28			59.6		43		47.7	27.8		42.3
56	53.1	32.3		64.6		41		38.6	28.4	45.6
84	60.5	37.7	63.7	73.8	39.1	33	52.9
CD8+HLA-DR+
time, days	Intensified group
0	41.9	13.5	23.4	4.74	13.3	17.6	19	17.2	17.8	10.5
28		12	19.6	5.6	20.7	15.8	16.4	19.8
56									17.5
84	41.1	8.25	29.6	6.67	18.6	20.8	14.1	19.4	24.3	14
time, days	Control group
0	10.3	13.6	30.2	9.57	14.6	20	7.94	11.9	8.86	24.3
28			31.1		12.4		11.6	12.1		38
56	15.5	8.88		9.98		16.4		11.5	17.3	20.9
84	17	11	12.3	16.7	10.1	11.2	9.86
CD8+CD38+
time, days	Intensified group
0	5.27	1.51	2.43	0.88	1.73	2.42	0.78	2.31	0.98	0.7
28		1.03	0.83	0.77	1.81	2.05	0.87	2.15
56									1.11
84	2.88	0.81	2.31	1.2	1.56	2.31	1.55	1.2	1.75	0.67
time, days	Control group
0	3.07	0.88	4.1	1.76	1.9	7.99	2.17	2.52	2.91	13.1
28			1.66		1.34		2.15	2.63		4.84
56	2.58	0.87		1.99		3.23		1.92	1.64	3.56
84	1.94	0.78	0.47	6.42	1.7	2.62	1.73
CD8+CD38+HLA-DR+
time, days	Intensified group
0	3.64	0.55	1.57	0.39	1.13	1.91	0.47	1.76	0.67	0.43
28		0.33	0.54	0.33	1.1	1.65	0.48	1.3
56									0.74
84	1.32	0.21	1.75	0.36	0.84	1.53	1.29	0.61	1.21	0.42
time, days	Control group
0	1.2	0.43	2.69	1.2	0.95	3.69	1.03	0.8	1.33	11
28			1.01		0.58		1	0.63		3.02
56	1.4	0.47		1.27		1.33		0.7	0.92	2.18
84	0.96	0.44	0.21	4.96	0.64	0.83	0.75
