# Supplementary material for: Doubling dolutegravir dosage reduces the viral reservoir in ART-treated people with HIV
Source: eLife. 2026 Jan 23;14:RP106931. doi: 10.7554/eLife.106931 (PMC12829993; doi:10.7554/eLife.106931)
Supplement: Figure 4—source data 1. [file elife-106931-fig4-data1.xlsx]

## Sheet: Sheet1
CD4+PD-1+
time, days	Intensified group
28		-2.4	2.81	-1.5	-2.7	-2.2	0.9	0.3
56									1.4
84	1	-4.5	23.31	-3.55	-5.9	-2.1	-1.7	-2	2	3.2
time, days	Control group
28			7.6		-4.3		-2.6	-0.8		-0.7
56	7.7	3.3		6.5		6.1		2.1	12.1	-2.6
84	10	0.7	-4	11.4	-2	1.8	2.3
CD4+TIGIT+
time, days	Intensified group
28		-0.3	-1.7	-1.88	1.9	-2	0.1	-1.8
56									-1.6
84	1.5	-0.9	1.8	-1.4	1.5	-2	-0.6	-2.8	-0.5	-2
time, days	Control group
28			-0.1		0		0.5	-1.6		-3.5
56	-1.7	1.3		-1.5		0.2		0	11.7	-2.4
84	3.6	3.3	0.9	1.3	-1.7	2.6	3.7
CD4+HLA-DR+
time, days	Intensified group
28		-1.14	1.5	0.04	2.57	0.81	-0.38	-0.64
56									-1.37
84	1.3	-2.97	5.1	-0.34	-0.72	1.06	-2.24	1.34	-0.16	-0.89
time, days	Control group
28			6.3		0.34		0.69	-0.68		-2.1
56	0.56	1		0.96		0.29		0.76	3.16	-4.1
84	2.27	0.33	-1.8	2.25	-0.4	-0.42	1.52
CD4+CD38+
time, days	Intensified group
28		0	-2.21	-0.38	0.23	0.55	0.11	0.1
56									0.48
84	0.61	-0.22	-0.25	0.51	0.15	0.49	-0.31	0.11	0.36	-0.34
time, days	Control group
28			-0.08		0.22		-1.65	0.88		-1.63
56	1.59	0.01		0.86		0.2		0.67	-2.11	-1.34
84	1	-0.38	-2.45	0.72	0.52	0.54	-1.35
CD4+CD38+HLA-DR+
time, days	Intensified group
28		0.01	-0.14	-0.032	-0.15	0.23	0.04	-0.16
56									0.1
84	-0.29	-0.042	0.44	-0.058	-0.22	0.01	0	-0.15	0.1	0.1
time, days	Control group
28			-0.16		-0.07		-0.04	0.15
56	0.24	0.2		0.51		0.36		0.14	0.11
84	0.26	0.04	-0.59	0.31	-0.1	-0.12	-0.14
