# Supplementary material for: Doubling dolutegravir dosage reduces the viral reservoir in ART-treated people with HIV
Source: eLife. 2026 Jan 23;14:RP106931. doi: 10.7554/eLife.106931 (PMC12829993; doi:10.7554/eLife.106931)
Supplement: Figure 4—source data 2. [file elife-106931-fig4-data2.xlsx]

## Sheet: Sheet1
CD8+PD-1+
time, days	Intensified group
28		0.7	2	-0.41	4.2	-1.4	-5	1.3
56									2.2
84	-2.2	0.2	3.8	0.8	-1	-1.6	0.4	0.9	2.8	0
time, days	Control group
28			1		9.2		-2.6	-0.74		-2.3
56	4.1	-3.8		1		1.7		-1.09	-16.4	-3.1
84	6.9	-1	-9.7	5.6	3.7	-0.7	-0.8
CD8+TIGIT+
time, days	Intensified group
28		-4.3	0.6	-0.6	1	1.3	1.5	1.3
56									-5.2
84	-0.9	-5.6	5.5	0.8	-5.5	0.2	-1.3	-3.8	-2.4	-0.3
time, days	Control group
28			-3.5		0.6		1	-3.5		-6.8
56	2.2	-7.6		-5.2		3.8		7.3	-13.4	-3.5
84	9.6	-2.2	0.6	4	-3.3	-4.2	6.2
CD8+HLA-DR+
time, days	Intensified group
28		-1.5	-3.8	0.86	7.4	-1.8	-2.6	2.6
56									-0.3
84	-0.8	-5.25	6.2	1.93	5.3	3.2	-4.9	2.2	6.5	3.5
time, days	Control group
28			0.9		-2.2		3.66	0.2		13.7
56	5.2	-4.72		0.41		-3.6		-0.4	8.44	-3.4
84	6.7	-2.6	-17.9	7.13	-4.5	-8.8	1.92
CD8+CD38+
time, days	Intensified group
28		-0.48	-1.6	-0.11	0.08	-0.37	0.09	-0.16
56									0.13
84	-2.39	-0.7	-0.12	0.32	-0.17	-0.11	0.77	-1.11	0.77	-0.03
time, days	Control group
28			-2.44		-0.56		-0.02	0.11		-8.26
56	-0.49	-0.01		0.23		-4.76		-0.6	-1.27	-9.54
84	-1.13	-0.1	-3.63	4.66	-0.2	-5.37	-0.44
CD8+CD38+HLA-DR+
time, days	Intensified group
28		-0.22	-1.03	-0.06	-0.03	-0.26	0.01	-0.46
56									0.07
84	-2.32	-0.34	0.18	-0.03	-0.29	-0.38	0.82	-1.15	0.54	-0.01
time, days	Control group
28			-1.68		-0.37		-0.03	-0.17		-7.98
56	0.2	0.04		0.07		-2.36		-0.1	-0.41	-8.82
84	-0.24	0.01	-2.48	3.76	-0.31	-2.86	-0.28
