# Supplementary material for: Doubling dolutegravir dosage reduces the viral reservoir in ART-treated people with HIV
Source: eLife. 2026 Jan 23;14:RP106931. doi: 10.7554/eLife.106931 (PMC12829993; doi:10.7554/eLife.106931)
Supplement: Figure 5—figure supplement 1—source data 1. [file elife-106931-fig5-figsupp1-data1.xlsx]

## Sheet: Sheet1
IL-1β
time, days	Intensified group
0	69	27.8	23.9	22	39.5	40.4	65.9	23	49.3	41.4
28	80.9	39.9	30.7	45.4	53.3	26.3	48.8	36.5	61.4	54.8
56	102.1	25.9	59.8	26.3	37.5	22	28.8	28.3	54.3	23.9
84	91.4	48.8	24.9	17.2	85.1	30.7	34.6	28.8	28.8	28.3
time, days	Control group
0	63.4	71.6	56.3	41.9	39.5	33.6	65.4	25.9	33.6	37.5
28	108.6	87.7	129.5	31.7	27.3	31.7	38.5	41.4	24.9	26.3
56	98.9	32.6	125	34.6	64.9	16.2	32.6		25.9	39.5
84	45.4	56.3	128.4	47.3	12.4	25.9	52.3	61.4	44.9	48.3
IL-6
time, days	Intensified group
0	45.6	16	16	11.8	52.3	33.4	35.8	11.8	34.6	26.6
28	86.4	25.4	32.2	33.4	46.8	30.9	38.9	11.8	34.6	16
56	95.3	24.7	50.5	12.2	32.8	11.8	11.8	11.8	21	11.8
84	73.3	52.9	28.5	11.8	95.3	23.5	15.4	11.8	11.8	11.8
time, days	Control group
0	30.9	51.7	55.3	35.8	28.5	30.9	26.6	11.8	17.2	21
28	56.5	61.9	134.8	12.2	11.8	33.4	16	39.5	11.8	13.5
56	95.9	11.8	118.3	26	49.2	17.2	11.8		19.8	34
84	35.8	40.7	82.8	41.3	11.8	42	29.7	48	50.5	21
IFN-γ
time, days	Intensified group
0	53.1	35.9	31.8	29.1	52.3	38.7	49.8	32.5	47.2	42.6
28	67.3	39.4	34.9	43.7	44.4	33.9	51.6	38	53.1	45.1
56	83.5	35.9	53.1	31.8	42.9	28.4	33.2	30.1	41.5	27.1
84	72.6	52.3	34.5	27.1	77.3	34.5	38	33.2	34.5	37.3
time, days	Control group
0	58.2	67.3	53.1	44.7	45.8	40.1	53.8	35.2	33.9	43.3
28	69.9	69.2	96.2	30.5	28.4	42.9	31.1	45.8	31.1	32.8
56	89.4	37.3	105.1	41.5	56.4	27.4	30.5		31.1	46.5
84	56.7	56	78.8	40.1	19.4	38.7	43.7	62.7	42.2	45.8
IL-17α
time, days	Intensified group
0	29.3	18.1	16.5	14.9	27.8	21.1	28.1	16.5	26.1	23.2
28	35.9	14.9	20.5	25.7	28.1	17.9	26.6	20.9	34.3	23.6
56	41.4	20.5	27.4	18.5	28.1	15.3	19.3	17.1	27.9	13.7
84	34.1	26.6	14.9	14.9	49	17.1	21.3	15.1	18.5	19.7
time, days	Control group
0	34.5	36.7	26.8	25.9	24.3	20.9	29.6	18.5	19.7	24.3
28	43.2	37.2	52.2	18.5	18.5	23.2	16.7	25.7	17.7	14.9
56	46.5	24.7	49.8	20.5	32.2	14.9	17.7		14.9	24.1
84	27.4	27.8	46.8	25.9	10	19.3	27	34.1	24.5	25.9
TNF-α
time, days	Intensified group
0	58.6	41.5	33.9	31.7	61.8	44.7	53.3	31.7	53.3	53.3
28	84.4	45.2	50.1	44.2	49	36	51.1	42.5	54.3	39.3
56	89.2	44.7	65.5	26.2	50.1	28.4	29.5	35	41.5	23.4
84	63.9	59.6	41.5	26.2	74.5	35	32.8	32.2	36	30.6
time, days	Control group
0	64.9	87.6	63.9	53.3	53.3	44.7	37.7	35	38.2	53.3
28	80.8	92.3	109	37.1	35	50.1	36	47.4	39.3	36
56	101.7	51.1	111.1	39.3	63.9	27.3	29.5		37.1	50.1
84	57.5	64.9	74.5	50.6	19.5	45.2	40.4	60.7	42.5	52.2
