# Supplementary material for: Doubling dolutegravir dosage reduces the viral reservoir in ART-treated people with HIV
Source: eLife. 2026 Jan 23;14:RP106931. doi: 10.7554/eLife.106931 (PMC12829993; doi:10.7554/eLife.106931)
Supplement: Figure 5—source data 1. [file elife-106931-fig5-data1.xlsx]

## Sheet: Sheet1
IL-1β
time, days	Intensified group
28	11.89	12.15	6.76	23.35	13.86	-14.09	-17.11	13.55	12.04	13.39
56	33.08	-1.93	35.91	4.33	-1.95	-18.42	-37.17	5.3	4.99	-17.49
84	22.41	21.03	0.97	-4.82	45.63	-9.74	-31.36	5.79	-20.56	-13.15
time, days	Control group
28	45.18	16.15	73.18	-10.25	-12.14	-1.94	-26.94	15.56	-8.7	-11.16
56	35.47	-38.93	68.73	-7.34	25.46	-17.37	-32.79		-7.74	1.95
84	-18.03	-15.25	72.07	5.42	-27.1	-7.74	-13.11	35.5	11.26	10.83
IL-6
time, days	Intensified group
28	40.81	9.38	16.18	21.62	-5.45	-2.46	3.06	0	0	-10.62
56	49.71	8.76	34.47	0.4	-19.49	-21.62	-24.07	0	-13.61	-14.83
84	27.7	36.89	12.48	0	43.04	-9.89	-20.49	0	-22.85	-14.83
time, days	Control group
28	25.56	10.25	79.5	-23.67	-16.69	2.46	-10.62	27.74	-5.47	-7.56
56	64.97	-39.89	63.05	-9.85	20.78	-13.69	-14.83		2.51	12.99
84	4.91	-10.93	27.55	5.5	-16.69	11.02	3.1	36.26	33.21	0
IFN-γ
time, days	Intensified group
28	14.21	3.48	3.07	14.54	-7.96	-4.85	1.83	5.51	5.82	2.49
56	30.46	0	21.24	2.7	-9.39	-10.26	-16.59	-2.37	-5.71	-15.47
84	19.57	16.4	2.73	-2	24.94	-4.16	-11.76	0.68	-12.69	-5.27
time, days	Control group
28	2.49	1.9	43.18	-14.27	-17.35	2.82	-22.66	10.56	-2.72	-10.46
56	-15.47	-29.95	52.08	-3.2	10.58	-12.67	-23.34		-2.72	3.22
84	-5.27	-11.26	25.76	-4.61	-26.44	-1.41	-10.14	27.49	8.37	2.5
IL-17α
time, days	Intensified group
28	6.68	-3.19	3.94	10.73	0.38	-3.13	-1.51	4.32	8.23	0.39
56	12.15	2.35	10.83	3.58	0.38	-5.72	-8.83	0.6	1.89	-9.45
84	4.84	8.49	-1.6	0	21.2	-3.92	-6.88	-1.4	-7.53	-3.48
time, days	Control group
28	8.75	0.55	25.35	-7.34	-5.81	2.32	-12.89	7.15	-1.97	-9.39
56	11.99	-11.96	23.04	-5.38	7.91	-5.92	-11.9		-4.76	-0.19
84	-7.09	-8.92	20.01	0	-14.32	-1.56	-2.64	15.57	4.82	1.53
TNF-α
time, days	Intensified group
28	25.86	3.77	16.19	12.47	-12.78	-8.65	-2.14	10.85	1.06	-13.97
56	30.58	3.24	31.61	-5.5	-11.71	-16.31	-23.78	3.27	-11.81	-29.86
84	5.3	18.19	7.59	-5.5	12.69	-9.74	-20.49	0.54	-17.22	-22.68
time, days	Control group
28	15.82	4.72	45.14	-16.13	-18.31	5.36	-1.63	12.42	1.08	-17.22
56	36.77	-36.46	47.23	-13.97	10.62	-17.41	-8.19		-1.08	-3.21
84	-7.42	-22.64	10.57	-2.68	-33.78	0.53	2.7	25.75	4.32	-1.07
