# Supplementary material for: Doubling dolutegravir dosage reduces the viral reservoir in ART-treated people with HIV
Source: eLife. 2026 Jan 23;14:RP106931. doi: 10.7554/eLife.106931 (PMC12829993; doi:10.7554/eLife.106931)
Supplement: Figure 5—source data 2. [file elife-106931-fig5-data2.xlsx]

## Sheet: Fig 5B
IL-1β							IL-6							IFN-γ							IL-17α							TNF-α
Intensified group			Control group				Intensified group			Control group				Intensified group			Control group				Intensified group			Control group				Intensified group			Control group
D0	D84		D0	D84			D0	D84		D0	D84			D0	D84		D0	D84			D0	D84		D0	D84			D0	D84		D0	D84
2590	1700		1500	1400			227	177		30.1	10.7			22	0.532		6.45	2.64			5.35	68.6		4	3.05			897	820		167	175
3040	1100		2520	2820			99.7	95		142	54.6			6.36	9.32		13.7	3.01			88	25.3		13.2	10.6			404	260		904	145
278	413		3720	675			0.228	0.727		67.2	1			0.228	11.5		21.3	1			0.228	0.727		7.94	1			458	0.727		1140	76.1
148	1080		699	1910			14	67.2		190	171			2.36	1.38		21.7	18.5			0.0342	1.67		28.2	4.47			52.7	148		1060	635
1860	1560		370	1920			153	72		66.2	16.2			5.46	0.732		4.89	15			0.216	0.732		8	0.157			152	1260		402	184
1730	1710		776	530			143	110		44.3	82.7			17.7	9.64		14.3	11.3			40.5	43.1		16.2	11.2			229	837		202	362
787	3400		1300	5290			124	134		92.4	260			12.6	10.9		19	50.9			4.41	5.2		39.1	36.2			936	843		244	272
3.86	1460		739	184			3.86	2.36		0.409	22.6			3.86	2.36		8	1.7			3.86	2.36		0.409	2.97			3.86	2.36		342	45.2
494	142		1120	739			10.2	0.188		75	160			0.048	3.09		0.184	15.8			0.048	0.188		0.184	63.5			88.6	86.8		407	304
7430	1510		2370	3560				168		265	208				10.6		16.2	18.2				9.78		11.9	7.06				584		519	584
