# Supplementary material for: Doubling dolutegravir dosage reduces the viral reservoir in ART-treated people with HIV
Source: eLife. 2026 Jan 23;14:RP106931. doi: 10.7554/eLife.106931 (PMC12829993; doi:10.7554/eLife.106931)
Supplement: Figure 6—figure supplement 1—source data 1. [file elife-106931-fig6-figsupp1-data1.xlsx]

## Sheet: Sheet1
CD4 count
time, days	Intensified group
0	523	817	492	1358	1113	640	954	1383	1252	753
28	467	783	323	1623	1046	674	942	914	724	768
56	433	640	315	1644		816	1119	1152	945	841
84	538	900	354	1362	1123	534	943	899	1319	765
time, days	Control group
0	705	1267	759	665	1237	692	225	790	414	1030
28	952	788	807	1018	1318	377	286	494	342	1106
56	847	938	618	912	1318	371	439	380	411	970
84	735	1069	688	1125	913	413	272	620	337	986
CD8 count
time, days	+ DTG
0	1277	506	1386	760	501	699	687	1853	1321	1118
28	1422	512	1025	1098	481	836	954	1587	887	1089
56	1071	393	994	1029		1135	1003	2246	964	1170
84	1213	540	901	784	533	633	727	1314	1239	1231
time, days	- DTG
0	758	2017	486	988	680	480	714	731	377	1817
28	951	1364	502	1189	726	288	820	474	311	1963
56	833	2187	407	1218	748	341	1061	490	425	1722
84	819	1658	504	1826	495	284	777	596	315	1722
CD4/CD8 ratio
time, days	+ DTG
0	0.41	1.61	0.35	1.79	2.22	0.92	1.39	0.75	0.95	0.67
28	0.33	1.53	0.32	1.48	2.17	0.81	0.99	0.58	0.82	0.71
56	0.4	1.63	0.32	1.6		0.72	1.12	0.51	0.98	0.72
84	0.44	1.67	0.39	1.74	2.11	0.84	1.3	0.68	1.06	0.62
time, days	- DTG
0	0.93	0.63	1.56	0.67	1.82	1.44	0.32	1.08	1.1	0.57
28	1	0.58	1.61	0.86	1.82	1.31	0.35	1.04	1.1	0.56
56	1.02	0.43	1.52	0.75	1.76	1.09	0.41	0.78	0.97	0.56
84	0.9	0.64	1.37	0.62	1.84	1.45	0.35	1.04	1.07	0.57
sCD14
time, days	+ DTG
0	740.2	986.7	598.8	320.3	514.4	676.6	569.9	637.8	710	561.5
28	643.6	663.5	824.4	310.3	529.6	746.1	676.5	534.6	964.4	610
56	786.7	569.4	791.4	378.2	675.6	892.9	617.2	739.9	934.3	798.9
84	865	785.6	1282.1	373.6	564.6	937.5	565.1	577.6	918.8	594.1
time, days	- DTG
0	692.5	1134.1	892	778	938.1	678.9	760.2	616.5	697.7	588.4
28	529.7	856.3	452.3	983.6	429.4	598.3	483.4	767.5	505	486.1
56	566.6	562.1	673.6	866.3	655.9	688.4	554.8		533.8	532.3
84	505.1	546.9	675.3	724.1	708.3	743.7	527.6	589	676.5	627.5
CRP
time, days	+ DTG
0	0.65	2.36	2.11	1.04	6.57	3.85	2.85	2.78	0.76	0.53
28	0.81	0.72	3.95	0.48	2.17	3.05	1.84	0.8	3.77	0.58
56	0.83	3.73	2.27	1.17		3.18	3.07	2.49	1.05	1.82
84	0.66	1.87	1.42	0.85	1.36	8.09	0.75	1.68	1.17	0.35
time, days	- DTG
0	1.48	7	1.17	0.98	3.9	0.67	1	0.94	2.31	1.04
28	2.52	7.56	2.04	2.24	5.14	0.79	0.88	1.11	0.61	0.59
56	1.92	9.5	5.1	1.1	2.11	2.15	0.32	2.82	0.96	0.51
84	3.47	8.98	0.46	3.56	4.5	4.04	0.3	1.31	1.67	0.94
