# Supplementary material for: Doubling dolutegravir dosage reduces the viral reservoir in ART-treated people with HIV
Source: eLife. 2026 Jan 23;14:RP106931. doi: 10.7554/eLife.106931 (PMC12829993; doi:10.7554/eLife.106931)
Supplement: Figure 6—source data 1. [file elife-106931-fig6-data1.xlsx]

## Sheet: Sheet1
CD4 count
time, days	Intensified group
28	-56	-34	-169	265	-67	34	-12	-469	-528	15
56	-90	-177	-177	286		176	165	-231	-307	88
84	15	83	-138	4	10	-106	-11	-484	67	12
time, days	Control group
28	247	-479	48	353	81	-315	61	-296	-72	76
56	142	-329	-141	247	81	-321	214	-410	-3	-60
84	30	-198	-71	460	-324	-279	47	-170	-77	-44
CD8 count
time, days	Intensified group
28	145	6	-361	338	-20	137	267	-266	-434	-29
56	-206	-113	-392	269	-501	436	316	393	-357	52
84	-64	34	-485	24	32	-66	40	-539	-82	113
time, days	Control group
28	193	-653	16	201	46	-192	106	-257	-66	146
56	75	170	-79	230	68	-139	347	-241	48	-95
84	61	-359	18	838	-185	-196	63	-135	-62	-95
CD4/CD8 ratio
time, days	Intensified group
28	0.8	0.95	0.89	0.83	0.98	0.88	0.71	0.77	0.86	1.05
56	0.99	1.01	0.89	0.89		0.79	0.8	0.69	1.03	1.07
84	1.08	1.03	1.11	0.97	0.95	0.92	0.93	0.92	1.12	0.92
time, days	Control group
28	1.08	0.92	1.03	1.27	1	0.91	1.11	0.96	1	0.99
56	1.09	0.68	0.97	1.11	0.97	0.75	1.31	0.72	0.88	0.99
84	0.96	1.03	0.87	0.92	1.01	1.01	1.11	0.96	0.97	1.01
sCD14
time, days	Intensified group
28	-96.58	-323.23	225.58	-10.06	15.2	69.49	106.61	-103.16	254.39	48.54
56	46.52	-417.35	192.6	57.88	161.23	216.3	47.35	102.12	224.27	237.35
84	124.82	-201.13	683.3	53.26	50.2	260.9	-4.72	-60.24	208.73	32.63
time, days	Control group
28	-162.78	-277.83	-439.75	205.64	-508.67	-80.54	-276.79	151.05	-192.73	-102.29
56	-125.9	-572.04	-218.47	88.3	-282.2	9.51	-205.4		-163.87	-56.07
84	-187.39	-587.23	-216.71	-53.84	-229.75	64.85	-232.61	-27.5	-21.22	39.07
CRP
time, days	Intensified group
28	0.159	-1.641	1.84	-0.556	-4.4	-0.8	-1.01	-1.98	3.006	0.051
56	0.182	1.37	0.16	0.13		-0.67	0.22	-0.29	0.286	1.292
84	0.013	-0.49	-0.69	-0.194	-5.21	4.24	-2.102	-1.1	0.406	-0.176
time, days	Control group
28	1.04	0.56	0.87	1.256	1.24	0.121	-0.119	0.174	-1.697	-0.45
56	0.44	2.5	3.93	0.116	-1.79	1.483	-0.675	1.884	-1.347	-0.531
84	1.99	1.98	-0.709	2.576	0.6	3.373	-0.7	0.374	-0.64	-0.1
