# Supplementary material for: Doubling dolutegravir dosage reduces the viral reservoir in ART-treated people with HIV
Source: eLife. 2026 Jan 23;14:RP106931. doi: 10.7554/eLife.106931 (PMC12829993; doi:10.7554/eLife.106931)
Supplement: Figure 7—figure supplement 1—source data 1. [file elife-106931-fig7-figsupp1-data1.xlsx]

## Sheet: Sheet1
CD4 count	CD8 count	CD4/CD8 ratio	Total DNA PBMC	US RNA PBMC	US RNA / total DNA	CD4+PD-1+	CD4+TIGIT+	CD4+HLA-DR+	CD4+CD38+	CD4+CD38+HLA-DR+	CD8+PD-1+	CD8+TIGIT+	CD8+HLA-DR+	CD8+CD38+	CD8+CD38+HLA-DR+	plasma sCD14	plasma CRP	plasma IL-6	plasma IFN-γ	plasma IL-1 β	plasma IL-17 α	plasma TNF-α
134.67	99.5	0.02	-0.15	-0.07	0.08	5.52	-0.25	0.66	0.96	0.16	3.2	2.7	3.72	-0.43	0.06	-127.5	0.83	31	14.07	23.88	5.73	16.3
-302.38	-220.83	-0.068	0.04	0.03	-0.002	1.77	1.2	0.56	-0.06	0.11	-2.07	-4.17	-2.79	-0.02	0.02	-381.19	1.35	-11.7	-11.56	-10.13	-5.39	-14.36
-42.83	-18	-0.005	-0.08	0.07	0.14	2.47	0.27	2.55	-0.86	-0.28	-2.93	-1.55	-5.68	-2.43	-1.67	-255.48	1.48	52.11	36.05	59.31	19.46	32.55
-46.17	-31	-0.023	-0.48	0.96		0.5	0.75	0.65	0.31	-0.15	-1.1	-0.45	-0.4	-1.2	-1.16	4.1	0.12	34.79	18.15	18.73	7.08	19.7
-56.5	-31.05	-0.008	0.15	-0.81	-0.953	-2.7	-0.45	-1.56	-0.07	-0.01	0.42	-4.02	-2.5	-0.47	-0.22	-280.36	-0.17	12.19	3.89	6.98	1.14	5.37
-138.33	-331.79	-0.027	-0.01	-0.59	-0.576	9.18	-0.25	2.45	-1.19	0.08	2.27	2.13	0.17	-0.84	-0.46	253.29	0.55	18.96	8.56	14.38	4.66	17.2
184.33	206.33	-0.045	-0.59	0.32		-1.93	-1.41	-0.09	-0.02	-0.04	0.06	-0.03	1.07	0.05	-0.04	24.85	-0.17	7.34	5.41	8.42	4.77	1.41
-30.17	0.67	-0.015	-0.77	-0.92	-0.154	-3.32	1.45	1.05	0.17	-0.15	1.77	-1.33	5.47	-0.02	-0.11	67.17	-3.94	-1.14	-1.63	11.63	3.79	-6.05
52.33	180	-0.055	0.06	-1	-1.068	-1.8	-1.67	0.76	0.44	0.12	-1.23	0.72	0.17	-0.22	-0.26	138.75	0.22	-9.68	-5.73	-12.46	-3.6	-9.94
51.42	201	-0.085	-0.76	-0.69	-0.07	-0.12	-0.15	-0.94	-0.05	0.02	-2.38	0.32	-2.93	0.3	0.28	50.57	-0.62	-10.42	-7.22	-23.32	-4.59	-12.06
-314.05	-47.5	-0.095	-0.03	0.08	0.11	-0.52	-1.83	0.13	0.09	-0.13	0.95	-0.62	2.03	-0.45	-0.61	-10.4	-0.94	0	1.13	7.25	1.41	4.8
276.67	283.33	0.04	0.19	0.22		5.15	-0.53	0.86	0.55	0.31	1.43	-1.93	1.39	0.89	0.66	88.99	0.89	-10.26	-6.59	-4.96	-4.24	-10.48
-267.14	-277.38	-0.012	-0.28	-0.42	-0.147	1.03	-0.88	-0.71	0.3	0.07	1.57	-3	1.04	0.19	0.13	194.37	1.17	-8.35	-2.08	2.25	2.12	-6.64
36.33	26.5	0.01	-0.03	-0.13	-0.104	1.6	-1	-0.45	-0.17	0.05	0	-0.15	1.75	-0.02	-0.01	100.74	0.42	-10.95	-5.2	-3.56	-3.67	-18.39
0	7.17	-0.002	0.28	1.23	0.949	-2.82	-0.57	0.04	0.28	-0.07	5.83	-0.8	-2.6	-0.35	-0.29	-301.9	-0.08	-1.42	-6.66	-0.08	-1.69	-8.19
-258.45	-142.98	-0.053	0.08	0.08		3.35	0.53	0.08	0.19	0.16	0.73	1.2	-3.27	-3.28	-1.66	-12.9	1.1	-2.38	-3.52	-7.73	-1.46	-3.93
99.5	161.5	0.06	0.76	0.73	-0.098	-0.53	1.48	0.85	-1.28	-0.07	-1.57	2.57	2.47	-0.16	-0.11	-199.52	-0.38	-7.97	-17.02	-22.1	-8.7	-2.82
-263.69	-188.45	-0.052	0.2	-0.13		0.13	-0.8	-0.15	0.61	0.11	-0.64	0.08	0	-0.1	-0.11	66.33	0.75	25.95	14.44	19.62	8.77	14.8
-37.83	-16.33	-0.018	-0.34	-0.79	-0.45	6.05	5.85	1.58	-1.06	0.06	-8.2	-6.7	4.22	-0.64	-0.21	-122.38	-1.12	4.55	-0.42	-3.6	-1.44	0.72
-2	1.17	0.002	0.06	-0.89	-0.946	-1	-2.35	-2.08	-1.15	-0.58	-1.93	-4.28	6	-6.51	-6.19	-46.29	-0.34	1.81	-2	-1.27	-2.94	-6.99
