# Supplementary material for: Doubling dolutegravir dosage reduces the viral reservoir in ART-treated people with HIV
Source: eLife. 2026 Jan 23;14:RP106931. doi: 10.7554/eLife.106931 (PMC12829993; doi:10.7554/eLife.106931)
Supplement: Figure 7—figure supplement 2—source data 1. [file elife-106931-fig7-figsupp2-data1.xlsx]

## Sheet: Sheet1
CD4 count	CD8 count	CD4/CD8 ratio	Total DNA PBMC	Intact DNA PBMC	Total DNA tissue	US RNA PBMC	US RNA / total DNA	CD4+PD-1+	CD4+TIGIT+	CD4+HLA-DR+	CD4+CD38+	CD4+CD38+HLA-DR+	CD8+PD-1+	CD8+TIGIT+	CD8+HLA-DR+	CD8+CD38+	CD8+CD38+HLA-DR+	plasma sCD14	plasma CRP	plasma IL-6	plasma IFN-γ	plasma IL-1 β	plasma IL-17 α	plasma TNF-α	tissue IFN-γ	tissue IL-6	tissue IL17 α	tissue TNF-α	tissue IL-1 β
30	61	-0.02	0.2	0.71	0.32	1.25	1.06	10	3.6	2.27	1	0.26	6.9	9.6	6.7	-1.13	-0.24	-187.39	1.99	4.91	-1.48	-18	-7.09	-7.42	-0.39	-0.45	-0.12	0.02	-0.03
-198	-359	0.01	0.2	0.75	0.07	-0.37	-0.58	0.7	3.3	0.33	-0.38	0.04	-1	-2.2	-2.6	-0.1	0.01	-587.23	1.98	-10.93	-11.26	-15.3	-8.92	-22.64	-0.66	-0.42	-0.1	-0.79	0.05
-71	18	-0.06	-0.01	-2.04	-0.38	-0.96	-0.96	-4	0.9	-1.8	-2.45	-0.59	-9.7	0.6	-17.9	-3.63	-2.48	-216.71	-0.71	27.55	25.76	72.1	20.01	10.57	-1.33	-1.83	-0.9	-1.17	-0.74
15	-64	0.03	-0.9					1	1.5	1.3	0.61	-0.29	-2.2	-0.9	-0.8	-2.39	-2.32	124.82	0.01	27.7	19.57	22.4	4.84	5.3	-1.62	-0.11	1.11	-0.04	-0.18
83	34	0.01	0.01	-0.05	-0.52	-0.77	-0.78	-4.5	-0.9	-2.97	-0.22	-0.042	0.2	-5.6	-5.25	-0.7	-0.34	-201.13	-0.49	36.89	16.4	21	8.49	18.19	0.17	-0.02	-0.54	-0.19	-0.44
-138	-485	0.04	0.11	-0.15	0.13	-0.45	-0.57	23.31	1.8	5.1	-0.25	0.44	3.8	5.5	6.2	-0.12	0.18	683.3	-0.69	12.48	2.73	1	-1.6	7.59	1.7			-2.8	0.17
4	24	-0.01	0.03	-0.28	1.61			-3.55	-1.4	-0.34	0.51	-0.058	0.8	0.8	1.93	0.32	-0.03	53.26	-0.19	0	-2	-4.8	0	-5.5	-0.23	0.68	1.69	0.45	0.86
10	32	-0.02	-0.36		-0.03	-1.07	-0.71	-5.9	1.5	-0.72	0.15	-0.22	-1	-5.5	5.3	-0.17	-0.29	50.2	-5.21	43.04	24.94	45.6	21.2	12.69	-0.87	-0.33		0.92	-0.08
-106	-66	-0.04	-0.08	-0.39	0.1	-0.8	-0.73	-2.1	-2	1.06	0.49	0.01	-1.6	0.2	3.2	-0.11	-0.38	260.9	4.24	-9.89	-4.16	-9.7	-3.92	-9.74	-0.26	-0.11	0.03	0.56	-0.01
-11	40	-0.03	-0.41	0.19	-0.18	-0.53	-0.12	-1.7	-0.6	-2.24	-0.31	0	0.4	-1.3	-4.9	0.77	0.82	-4.72	-2.1	-20.49	-11.76	-31.4	-6.88	-20.49	-0.06	0.04	0.07	-0.05	0.64
-484	-539	-0.04	0.07	-0.53	-0.05	0.09	0.01	-2	-2.8	1.34	0.11	-0.15	0.9	-3.8	2.2	-1.11	-1.15	-60.24	-1.1	0	0.68	5.8	-1.4	0.54					2.58
460	838	-0.04	0.06	-1.08	-0.32	0.84	0.79	11.4	1.3	2.25	0.72	0.31	5.6	4	7.13	4.66	3.76	-53.84	2.58	5.5	-4.61	5.4	0	-2.68	-0.07	-0.05	-0.8	-0.22	0.44
67	-82	0.05	-0.02	-0.47	-0.19	-0.64	-0.61	2	-0.5	-0.16	0.36	0.1	2.8	-2.4	6.5	0.77	0.54	208.73	0.41	-22.85	-12.69	-20.6	-7.53	-17.22	1.81	-1.73		-0.01	-0.54
12	113	-0.03	-0.1	-0.75	0.06	-0.82	-0.72	3.2	-2	-0.89	-0.34	0.1	0	-0.3	3.5	-0.03	-0.01	32.63	-0.18	-14.83	-5.27	-13.2	-3.48	-22.68					-0.69
-324	-185	0.01	0.1	0.9	0.29	1.69	1.59	-2	-1.7	-0.4	0.52	-0.1	3.7	-3.3	-4.5	-0.2	-0.31	-229.75	0.6	-16.69	-26.44	-27.1	-14.32	-33.78	0.49	-0.61	-1.71	-0.34	0.72
-279	-196	0	0.46	-0.67	0.13	0.96		1.8	2.6	-0.42	0.54	-0.12	-0.7	-4.2	-8.8	-5.37	-2.86	64.85	3.37	11.02	-1.41	-7.7	-1.56	0.53	-0.1	0.27	-0.16	0.25	-0.17
47	63	0.05	0.95	0.24	0.01	0.36	-0.59	2.3	3.7	1.52	-1.35	-0.14	-0.8	6.2	1.92	-0.44	-0.28	-232.61	-0.7	3.1	-10.14	-13.1	-2.64	2.7	0.43	0.45	-0.03	0.05	0.61
-170	-135	-0.02		0.9	-0.09			2.1	0	0.76	0.67	0.14	-1.09	7.3	-0.4	-0.6	-0.1	-27.5	0.37	36.26	27.49	35.5	15.57	25.75	-0.67	1.74	0.86	-0.88	-0.61
-77	-62	-0.01	-0.14	0.83	-0.03	-1.51	-1.37	12.1	11.7	3.16	-2.11	0.11	-16.4	-13.4	8.44	-1.27	-0.41	-21.22	-0.64	33.21	8.37	11.3	4.82	4.32	1.93	0.33	2.54	-0.13	-0.18
-44	-95	0	0.37	-0.74	-0.01	-0.13	-0.5	-2.6	-2.4	-4.1	-1.34	-0.97	-3.1	-3.5	-3.4	-9.54	-8.82	39.07	-0.1	0	2.5	10.8	1.53	-1.07	0.05	-0.11	-0.23	0.05	0.18
