# Supplementary material for: Doubling dolutegravir dosage reduces the viral reservoir in ART-treated people with HIV
Source: eLife. 2026 Jan 23;14:RP106931. doi: 10.7554/eLife.106931 (PMC12829993; doi:10.7554/eLife.106931)
Supplement: Figure 7—source data 1. [file elife-106931-fig7-data1.xlsx]

## Sheet: Sheet1
Age	CD4 count nadir	viral load pre-ART	years suppression	CD4 count	CD8 count	CD4/CD8 ratio	Total DNA PBMC	Intact DNA PBMC	Total DNA tissue	US RNA PBMC	US RNA / total DNA	CD4+PD-1+	CD4+TIGIT+	CD4+HLA-DR+	CD4+CD38+	CD4+CD38+HLA-DR+	CD8+PD-1+	CD8+TIGIT+	CD8+HLA-DR+	CD8+CD38+	CD8+CD38+HLA-DR+	plasma sCD14	plasma CRP	plasma IL-6	plasma IFN-γ	plasma IL-1 β	plasma IL-17 α	plasma TNF-α	tissue IFN-γ	tissue IL-6	tissue IL-17 α	tissue TNF-α	tissue IL-1 β
64	280	3	10.23	705	758	-0.03	2.11	1.01	2.35	1.6	-0.51	22.2	28.2	3.69	2.5	0.2	32.6	50.9	10.3	3.07	1.2	2.84	0.17	1.49	1.77	1.8	1.54	1.81	0.81	1.48	0.6	2.22	3.18
51	320	3.74	4.6	1267	2017	-0.2	2.02	1.29	2.79	2.47	0.45	10.3	14.1	5.98	1.62	0.17	16.5	39.9	13.6	0.88	0.43	3.05	0.85	1.71	1.83	1.85	1.56	1.94	1.14	2.15	1.12	2.96	3.4
25	346	4.38	3.34	759	486	0.19	1.55	2.8	2.77	2.15	0.6	23.7	20.3	15.9	3.15	0.8	34.5	63.1	30.2	4.1	2.69	2.95	0.07	1.74	1.72	1.75	1.43	1.81	1.33	1.83	0.9	3.06	3.57
61	153	2.48	7.9	523	1277	-0.39	1.79	0.71	0.86	0.4	-1.39	39.2	33.9	18.2	2.22	0.89	45.6	59.1	41.9	5.27	3.64	2.87	-0.19	1.66	1.72	1.84	1.47	1.77	1.34	2.36	0.73	2.95	3.41
47	250	3.6	3.29	817	506	0.21	2.9	2.47	2.53	2.23	-0.67	24.1	17.8	9.15	0.73	0.12	14	46.5	13.5	1.51	0.55	2.99	0.37	1.2	1.56	1.44	1.26	1.62	0.8	2	1.94	2.61	3.48
56	30	4.2	7.28	492	1386	-0.45	2.76	1.94	2.99	3.2	0.44	9.19	27.4	18.6	3.42	0.65	11.9	34.1	23.4	2.43	1.57	2.78	0.32	1.2	1.5	1.38	1.22	1.53	-0.64	-0.64	-0.64	2.66	2.44
36	747	5.33	2.94	1358	760	0.25	2.19	1.74	0.87	0.59	-1.59	12.2	11.8	3.6	1.69	0.093	10.1	28.6	4.74	0.88	0.39	2.51	0.02	1.07	1.46	1.34	1.17	1.5	0.37	1.15	-1.47	1.72	2.17
60	437	3.43	0.44	1113	501	0.35	2.71		2.69	2.44	-0.27	21.5	15	6.52	1.16	0.34	30.5	54.9	13.3	1.73	1.13	2.71	0.82	1.72	1.72	1.6	1.44	1.79	0.74	2.19	-0.67	2.18	3.27
53	68	5.4	3.75	640	699	-0.04	2.88	1.77	3.18	2.94	0.07	31.8	25.9	8.94	1.89	0.45	26.2	48.1	17.6	2.42	1.91	2.83	0.59	1.52	1.59	1.61	1.32	1.65	1.25	2.16	1.61	2.36	3.24
48	333	3.97	3.58	954	687	0.14	2.3	2.31	2.51	1.9	-0.4	21.2	23.2	6.95	1.45	0.15	34.1	57.5	19	0.78	0.47	2.76	0.45	1.55	1.7	1.82	1.45	1.73	1.1	2.09	0.64	2.97	2.9
46	531	4.9	3.22	1383	1853	-0.13	2	1.66	2.41	1.43	-0.57	27	24.8	7.55	1.27	0.34	17.1	37	17.2	2.31	1.76	2.8	0.44	1.07	1.51	1.36	1.22	1.5	0.59	0.59	0.59	0.59	0.59
73	248	5.44	4.16	665	988	-0.17	2.52	1.87	3.07	1.14	-1.38	22.5	22	8.15	0.84	0.16	24.5	69.8	9.57	1.76	1.2	2.89	-0.01	1.55	1.65	1.62	1.41	1.73	1.34	2.28	1.45	3.03	2.84
43	676	5.7	5.33	1252	1321	-0.02	2.52	1.65	2.67	1.33	-1.19	10.2	20.1	8.38	1.12	0.12	12.3	43.2	17.8	0.98	0.67	2.85	-0.12	1.54	1.67	1.69	1.42	1.73	-1.32	1.01	-1.32	1.95	2.69
66	130	5.6	3.15	753	1118	-0.17	3.04	1.81	2.97	2.7	-0.34	35.9	23.4	7.34	1.49	0.24	22.4	38.4	10.5	0.7	0.43	2.75	-0.28	1.42	1.63	1.62	1.37	1.73					3.87
56	521	5	7.73	1237	680	0.26	1.98	1.16	2.56	0.79	-1.19	23.7	18.2	7.53	1.92	0.33	37.5	42.4	14.6	1.9	0.95	2.97	0.59	1.45	1.66	1.6	1.39	1.73	0.69	1.82	0.9	2.6	2.57
30	274	4.35	3.38	692	480	0.16	1.18	2.23	1.73	1.12		21.6	18.9	6.32	2.91	0.47	25	37.2	20	7.99	3.69	2.83	-0.18	1.49	1.6	1.53	1.32	1.65	1.16	1.65	1.21	2.31	2.89
53	24	4.4	4.14	225	714	-0.5	1.58	1.59	3.24	2.02	0.44	22.7	20.5	3.31	4.47	0.5	47.4	46.7	7.94	2.17	1.03	2.88	0	1.42	1.73	1.82	1.47	1.58	1.28	1.97	1.59	2.39	3.12
39	190	4.65	7.61	790	731	0.03	1.76	1.22	2.5	0.98	-0.78	13.2	19.7	2.89	1.26	0.19	7.67	31.3	11.9	2.52	0.8	2.79	-0.03	1.07	1.55	1.41	1.27	1.54	0.9	-0.39	-0.39	2.53	2.87
67	68	6.6	4.82	414	377	0.04	2.52	1.28	2.71	2.69	0.17	24.8	19.8	3.9	5.39	0.57	48	41.8	8.86	2.91	1.33	2.84	0.36	1.24	1.53	1.53	1.29	1.58	-0.73	1.88	-0.73	2.61	3.05
43	401	4.83	3.53	1030	1817	-0.25	2.3	1.81	3.13	2.38	0.08	23.9	16.2	16.3	3.43	1.26	25.8	49.1	24.3	13.1	11	2.77	0.02	1.32	1.64	1.57	1.39	1.73	1.21	2.42	1.07	2.72	3.37
