# Supplementary material for: Doubling dolutegravir dosage reduces the viral reservoir in ART-treated people with HIV
Source: eLife. 2026 Jan 23;14:RP106931. doi: 10.7554/eLife.106931 (PMC12829993; doi:10.7554/eLife.106931)
Supplement: Table 1—source data 1. [file elife-106931-table1-data1.xlsx]

## Sheet: Sheet1
Participant	Arm	Age	BMI	Time since first positive HIV serology	Cumulative time of untreated HIV infection	Cumulative time of viral suppression	Continuous time of viral suppression before study	Time on DTG-containing ART regimen before study	Nadir CD4+ count	First measured plasma viral load	CD4+ count	CD8+ count	CD4/CD8 ratio	Total HIV DNA in PBMCs	Intact HIV DNA in PBMCs	US HIV RNA in PBMCs	US RNA/total DNA ratio in PBMCs	Total HIV DNA in rectal tissue	Plasma DTG concentration	Tissue DTG concentration	Plasma 3TC concentration	Tissue 3TC concentration
P1	Control	64	30	24.2409	7.80835	16.2491	10.2259	3.40589	280	3	705	758	0.933254	128	10.2487	39.4	0.0409342	222	2008	532.067	101.9	1215
P2	Control	51	22	13.3771	3.93977	8.58316	4.59685	2.15195	320	3.73799	1267	2017	0.630957	104	19.7141	295	0.213112	614	3179	495.237	1023	2922
P3	Control	25	22	3.54552	0.117728	3.33744	3.33744	3.42779	346	4.38382	759	486	1.54882	35.8	624.21	142	2.72688	586	3979	1066.8	232.6	1341
P12	Control	73	27	8.60507	0.687201	6.20945	4.16153	3.38946	248	5.43616	665	988	0.676083	333	73.2936	13.8	0.0256067	1170	5536	787.2	1034	2368
P15	Control	56	28	10.9405	2.97604	7.73443	7.73443	3.75359	521	5	1237	680	1.8197	94.7	14.6212	6.18	0.538791	363	2899	539.239	476.1	3130
P16	Control	30	19	3.7755	0.147844	3.37577	3.37577	3.62765	274	4.35218	692	480	1.44544	15.1	168.581	13.1	1.16358	53.4	4613	873.693	1616	1882
P17	Control	53	20	25.3744	17.1526	4.62149	4.14237	3.18412	24	4.4	225	714	0.316228	37.9	39.2077	105	0.397341	1720	3941	697.865	385.5	2278
P18	Control	39	26	8.27652	0.019165	7.61123	7.61123	3.78371	190	4.64933	790	731	1.07152	57.7	16.7244	9.48	0.270277	314	1969	1810.34	135.7	2109
P19	Control	67	25	6.99521	0.0383299	4.82136	4.82136	3.8987	68	6.5955	414	377	1.09648	332	19.1707	486	0.0646028	508	5306	775.088	695.2	1492
P20	Control	43	25	12.9528	5.33333	4.90349	3.52635	3.87953	401	4.83315	1030	1817	0.562341	198	64.2468	240	0.456469	1350	3113	481.871	207.2	4495
P4	DTG	61	22	20.6762	0.0383299	7.8987	7.8987	3.30185	153	2.48287	523	1277	0.40738	61.8	5.16727	2.53	0.307869	7.27	2066	408.714	77.47	900
P5	DTG	47	36	16.2245	6.07529	7.92334	3.2909	3.30185	250	3.59999	817	506	1.62181	798	292.552	170	2.84097	341	6593	633.605	1156	3187
P6	DTG	56	22	12.2574	3.33196	7.28268	7.28268	3.50719	30	4.20412	492	1386	0.354813	579	86.9861	1580	3.95961	981	5027	890.147	334.6	2322
P7	DTG	36	26	3.5373	0.15332	2.94319	2.94319	3.38398	747	5.33445	1358	760	1.77828	153	55.1534	3.92	0.0414258	7.45	6301	1036.46	838.8	2159
P8	DTG	60	23	18.0287	1.0486	12.9144	0.435318	3.40589	437	3.42975	1113	501	2.23872	512		276	0.0652775	489	3136	538.724	152	1931
P9	DTG	53	23	18.6968	0.0164271	16.5311	3.74812	3.55373	68	5.4	640	699	0.912011	753	58.556	876		1510	2029	534.67	105	1233
P10	DTG	48	21	14.9295	2.31896	10.8665	3.58111	3.52635	333	3.96942	954	687	1.38038	199	202.366	79.2	2.77493	323	2780	714.171	297.2	2317
P11	DTG	46	18	5.28679	1.47023	3.22245	3.22245	3.81656	531	4.89818	1383	1853	0.74131	99.1	45.2366	26.8	0.164245	257	237	302.798	50	934
P13	DTG	43	24	6.10815	0.131417	5.32786	5.32786	3.54825	676	5.70415	1252	1321	0.954993	330	44.2129	21.3	1.46518	465	3395	581.4	195.7	2114
P14	DTG	66	26	21.5168	0.123203	15.0418	3.154	2.705	130	5.6	753	1118	0.676083	1090	65.034	496	1.21372	943	6453		474.2
